# Supplementary material
Source: publisher figshare collection journal article supplement (https://springernature.figshare.com/ndownloader/files/21929181)
Supplement: Supplementary file [file 21929181]

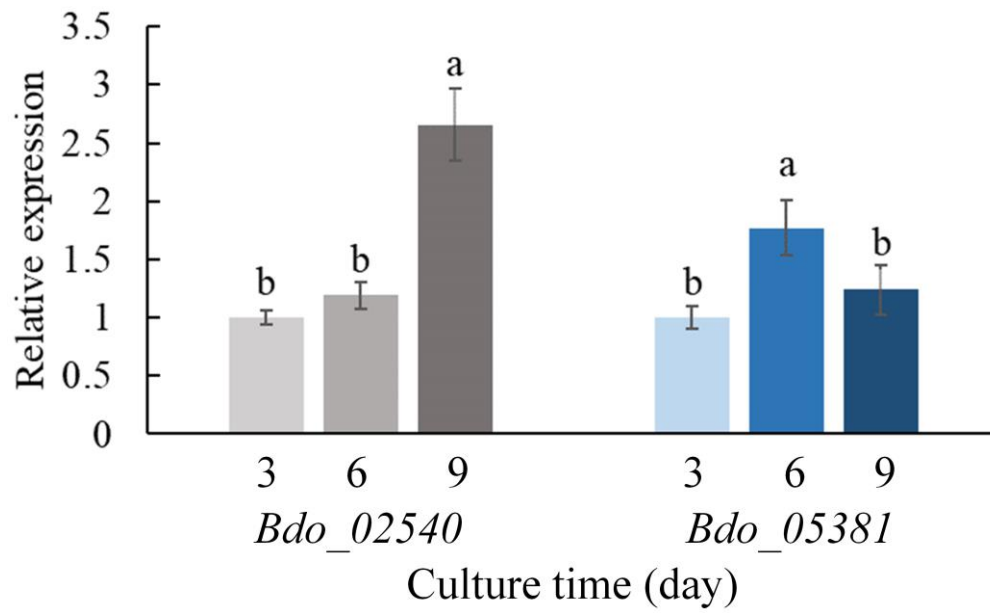

**Fig. S5** *Bdo\_02540* and *Bdo\_05381* expression in mycelium cultured for 3, 6, and 9 days on PDA

The expression in 3-day-old culture with mycelium appeared whitish on the underside of the plate was used as the control. The relative expression levels were calculated according to the  $2^{-\Delta\Delta C_t}$  method. Bars represent the standard error of three replicates. Different letters represent significant differences according to an ANOVA and Duncan's method ( $P < 0.05$ ).
